# Supplementary material for: Electron induced reactions of surface adsorbed tungsten hexacarbonyl (W(CO)6)
Source: Royal Society of Chemistry journal article supplement (doi:10.1039/c3cp43902j), 2013-01-01
Supplement: c3cp43902j.pdf [file c3cp43902j.pdf]

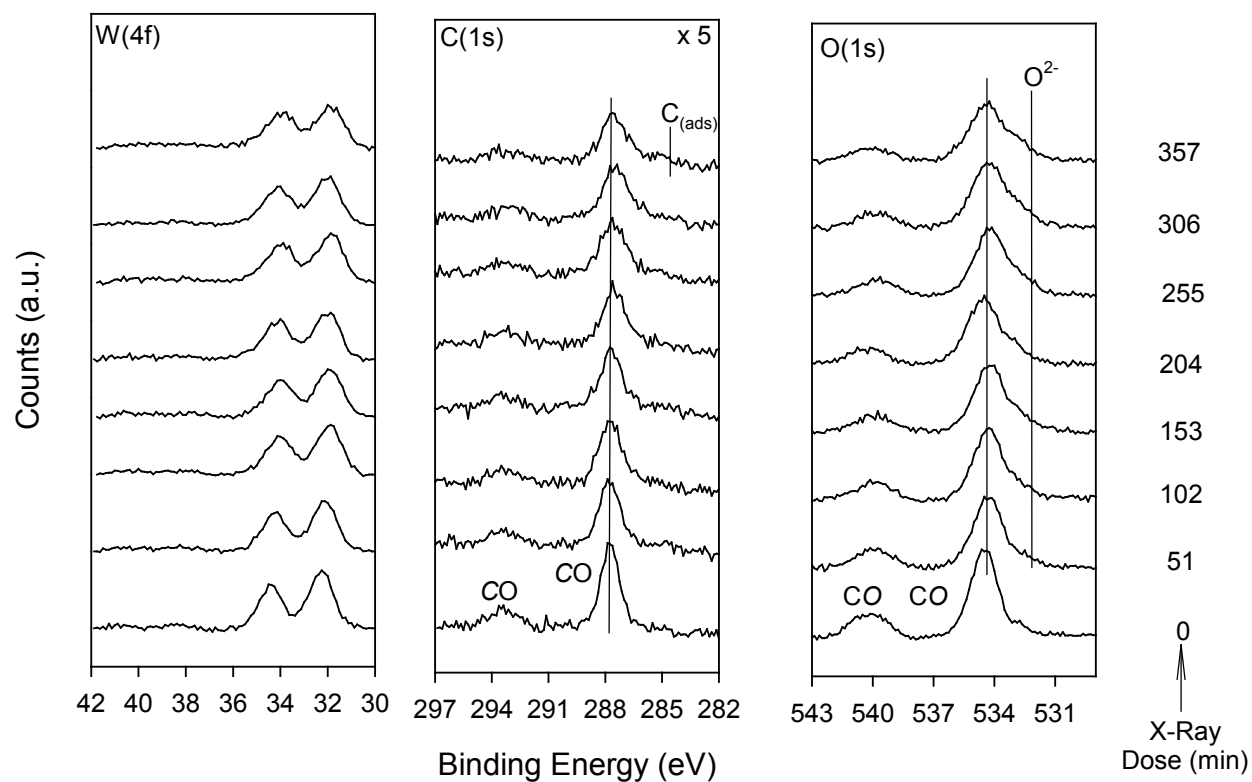

**SI 1:** Evolution of the W(4f), C(1s), and O(1s) XP regions for a 1.5nm thick film of  $W(CO)_6$  irradiated with X-rays (Mg  $K\alpha$  1253.6 eV); the x-ray exposure time is shown on the right hand side of each W(4f), C(1s), and O(1s) spectrum.
